# Supplementary material for: Enhanced toughness of hydroxyapatite–poly(ethylene terephthalate) composites by immersion in water
Source: Royal Society of Chemistry journal article supplement (doi:10.1039/d1ma00512j), 2021-01-01
Supplement: d1ma00512j1.pdf [file d1ma00512j1.pdf]

## Supporting Information

### Enhanced Toughness of Hydroxyapatite-poly(ethylene terephthalate) Composites by Immersion in Water

Yui Okuda, Ken Hirota, Tadashi Mizutani,\* and Yusuke Numamoto

<sup>a</sup> Department of Applied Chemistry, Graduate School of Science and Engineering, Doshisha University, Kyotanabe, Kyoto 610-0321 Japan

<sup>b</sup> Goo Chemical Corporation, Limited., 58 Ijiri, Iseda-cho, Uji, Kyoto 611-0043 Japan

\*E-mail address of corresponding author

[tmizutan@mail.doshisha.ac.jp](mailto:tmizutan@mail.doshisha.ac.jp)

Number of pages: 15

Number of figures: 8

Number of tables 3.

#### 1. Characterization of the composite powder

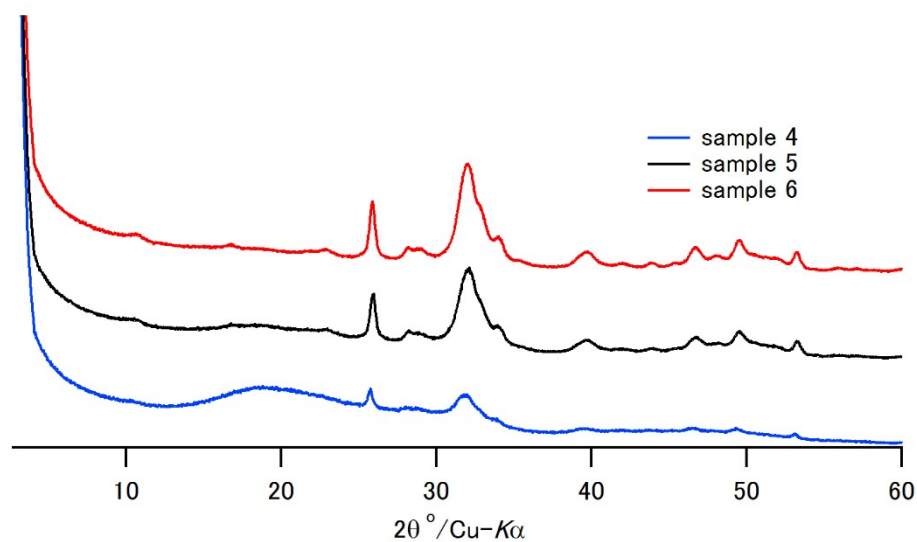

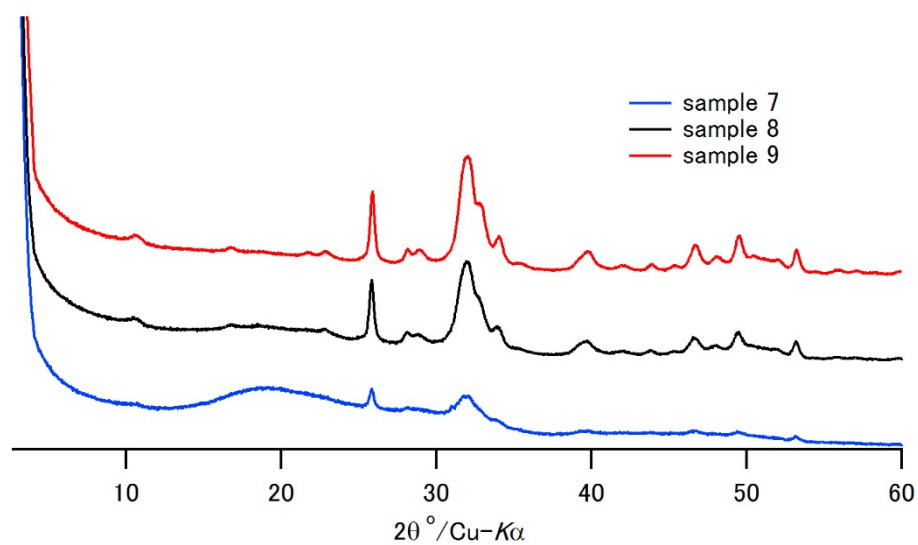

Figure S1. XRD patterns of samples 4-9.

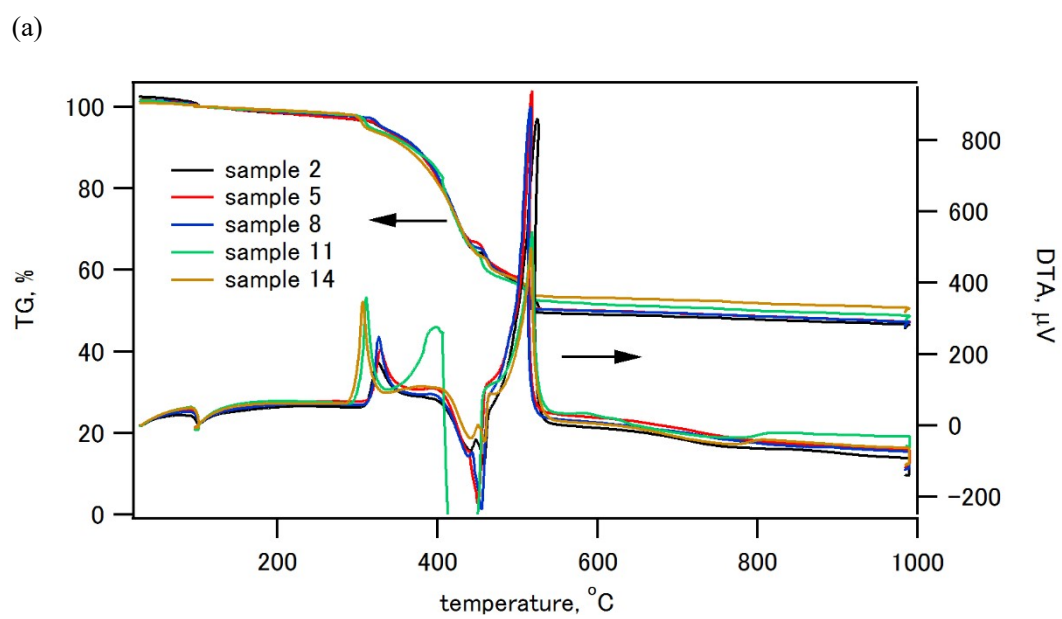

(b)

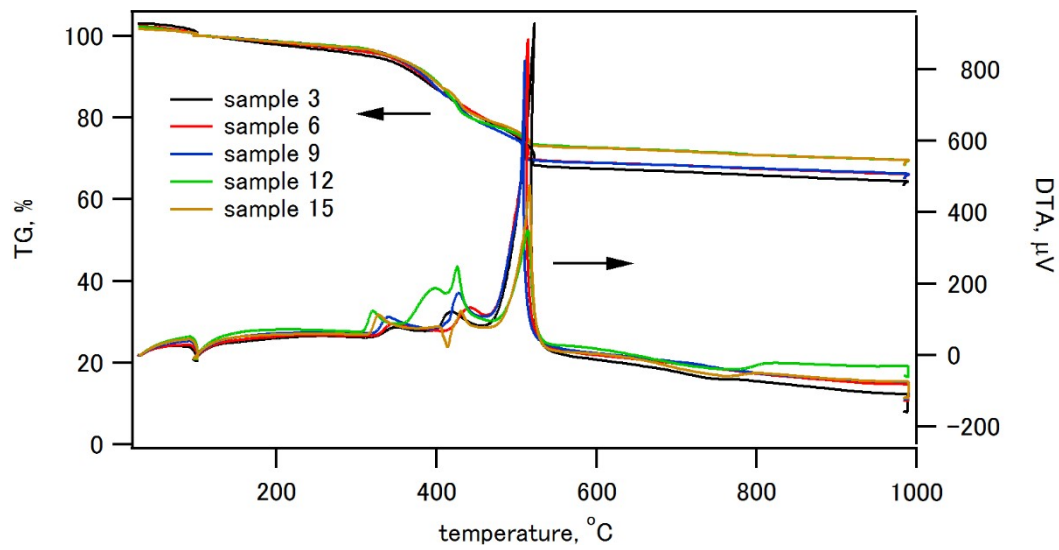

Figure S2. TG/DTA traces of the composites containing 50 wt% (a) and 70 wt% (b) of HAP.

## 2. Stress-strain curves of the composite compacts.

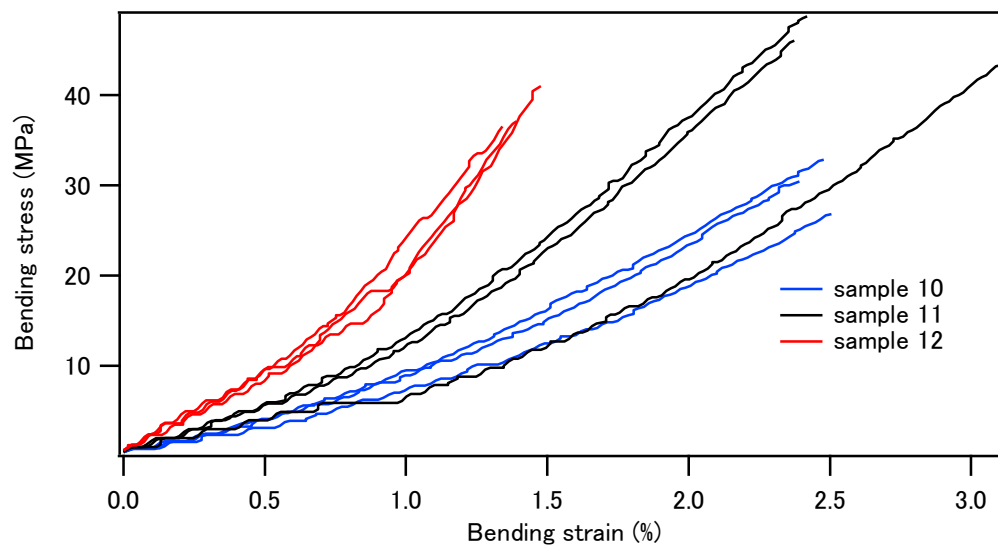

Figure S3. Representative stress-strain curves of samples 10-12 ( $N = 3$ ).

**3. Water resistant test: UV-visible spectra of the aqueous phase after immersion of the composite compacts.**

(a)

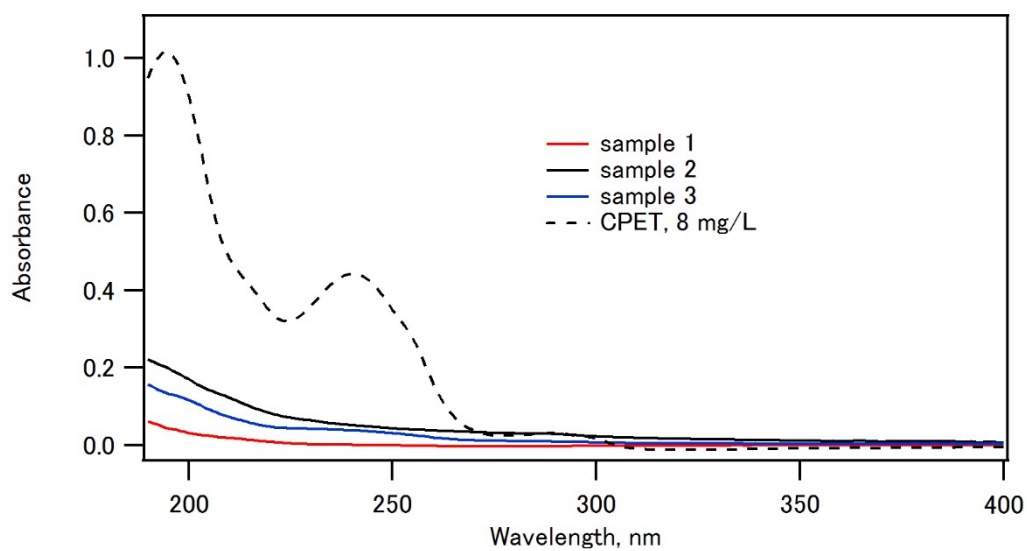

(b)

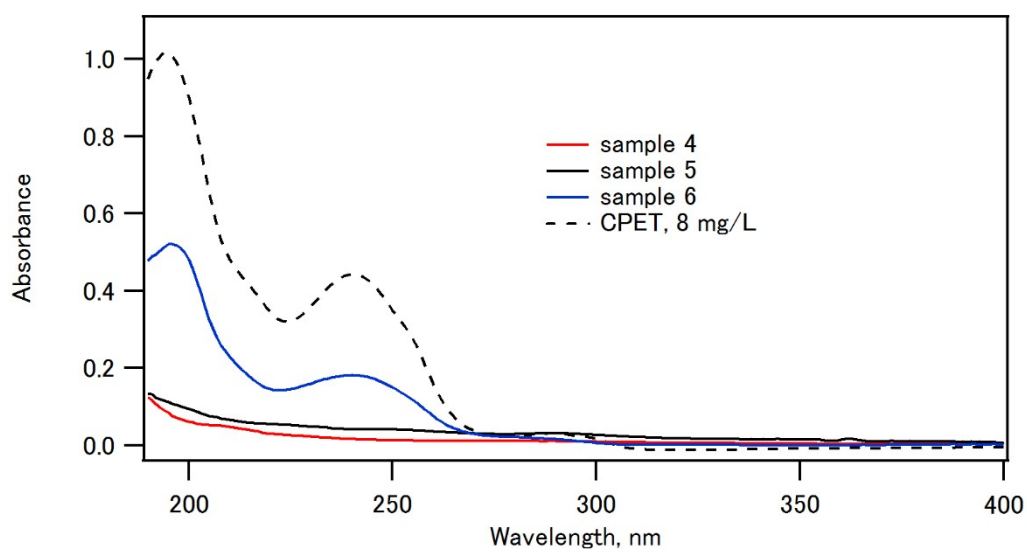

(c)

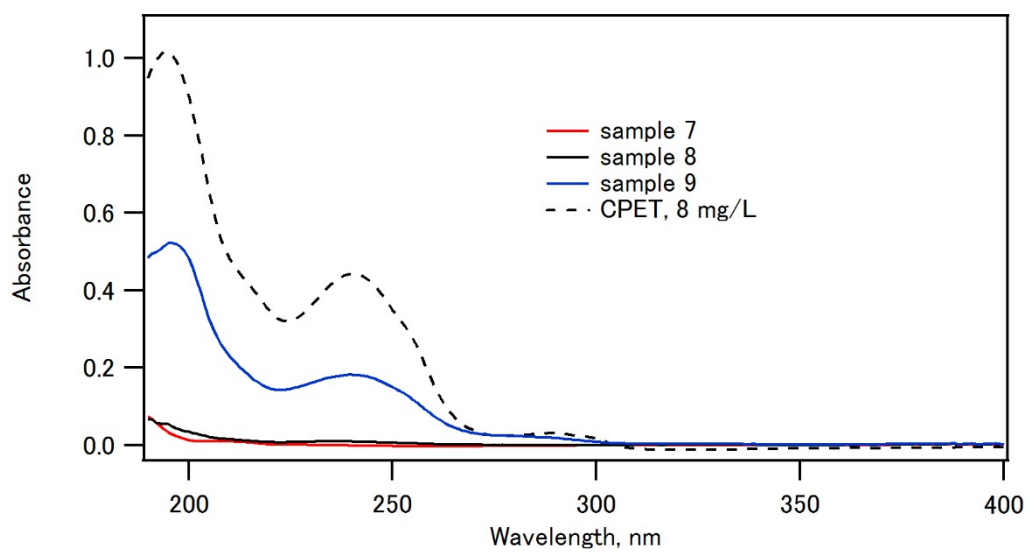

(d)

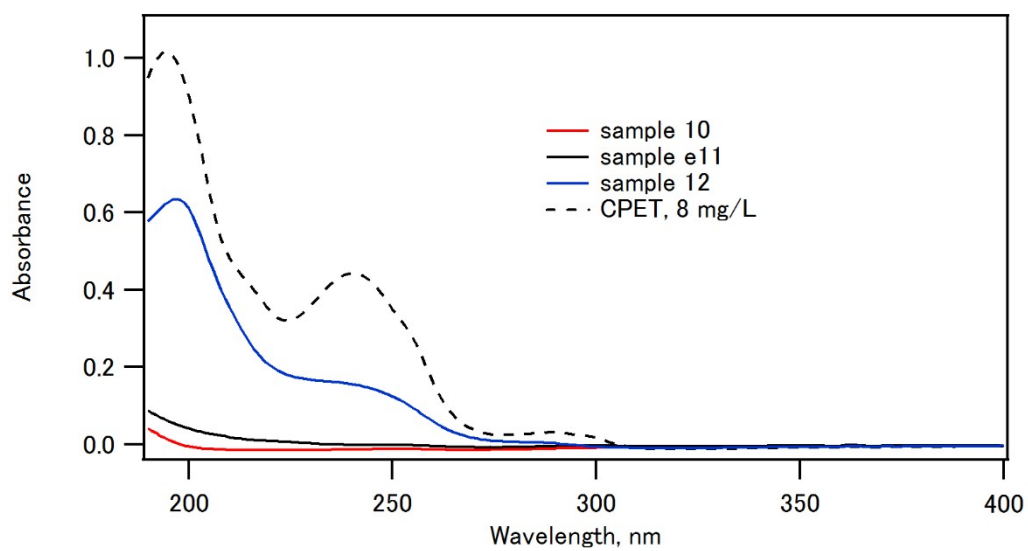

(e)

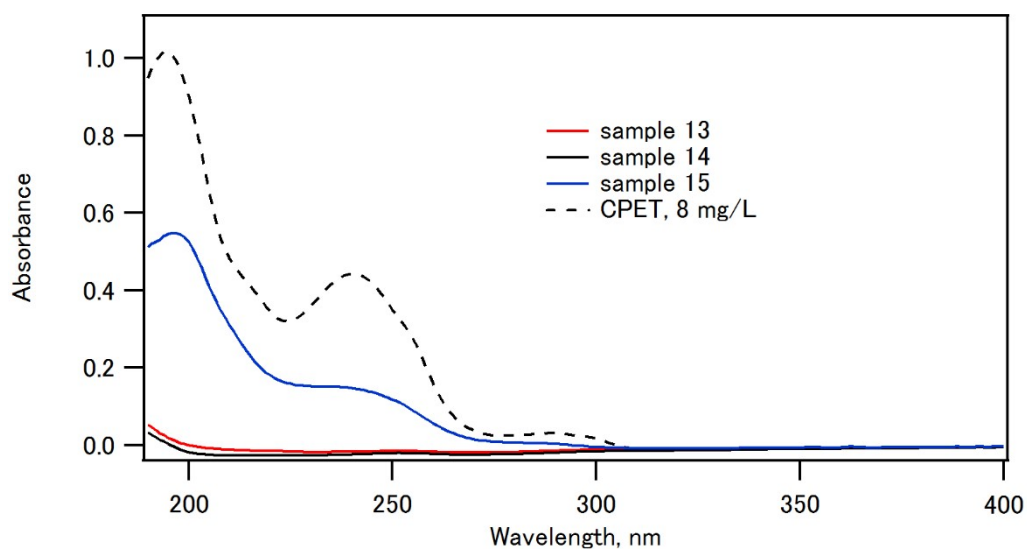

(f)

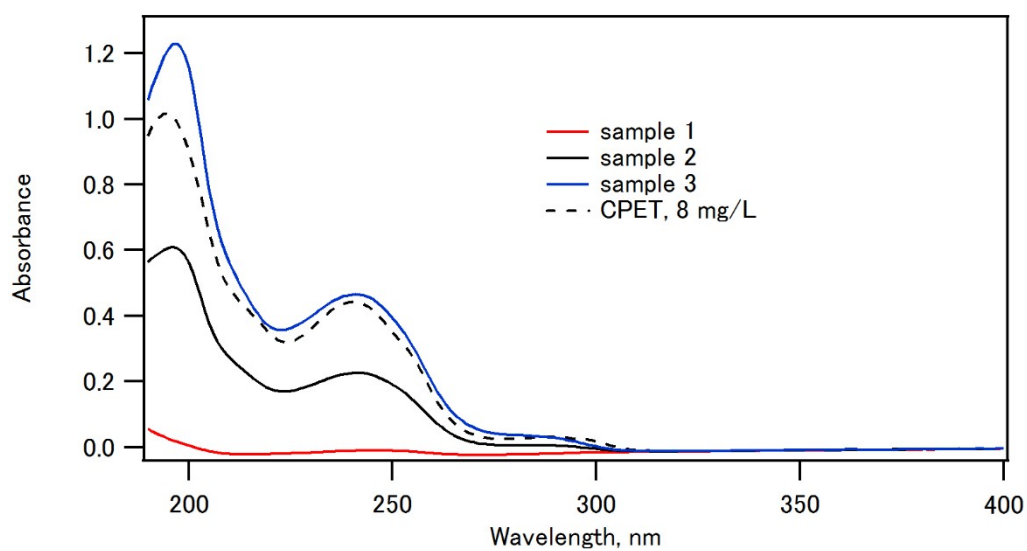

(g)

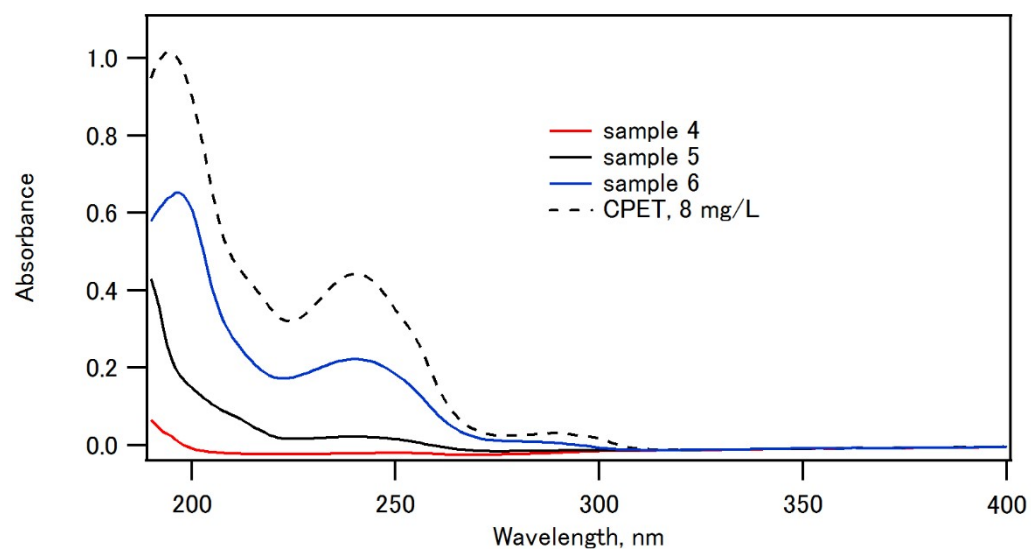

(h)

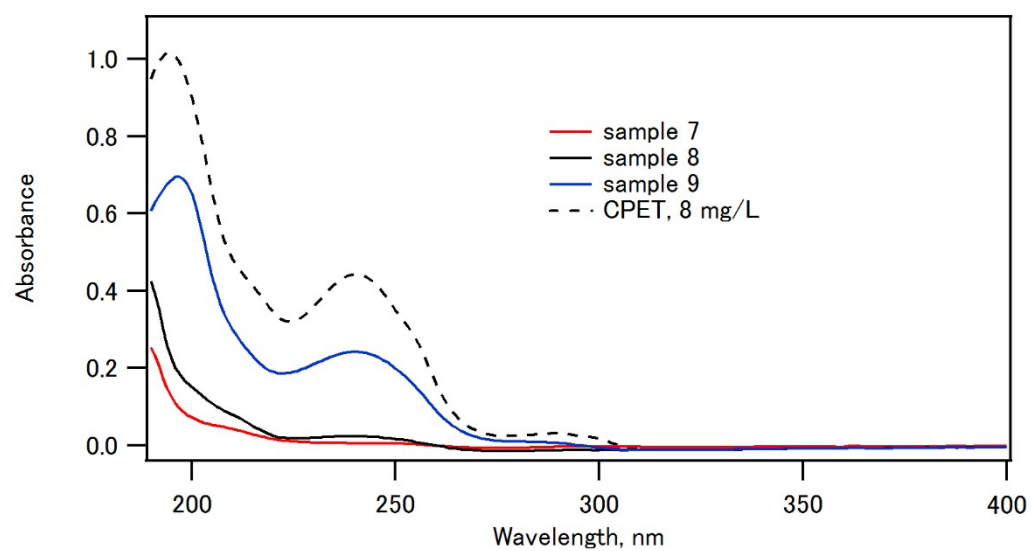

(i)

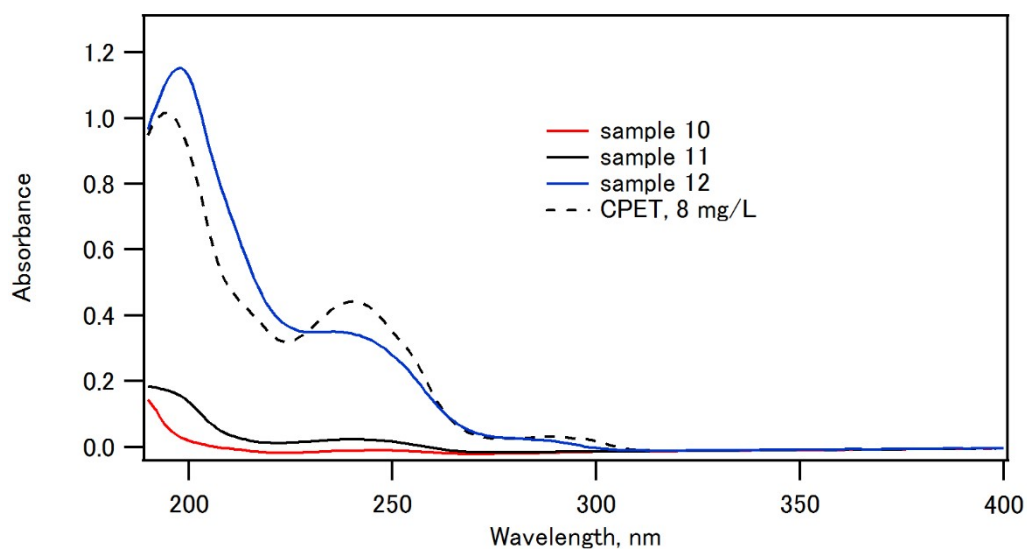

(j)

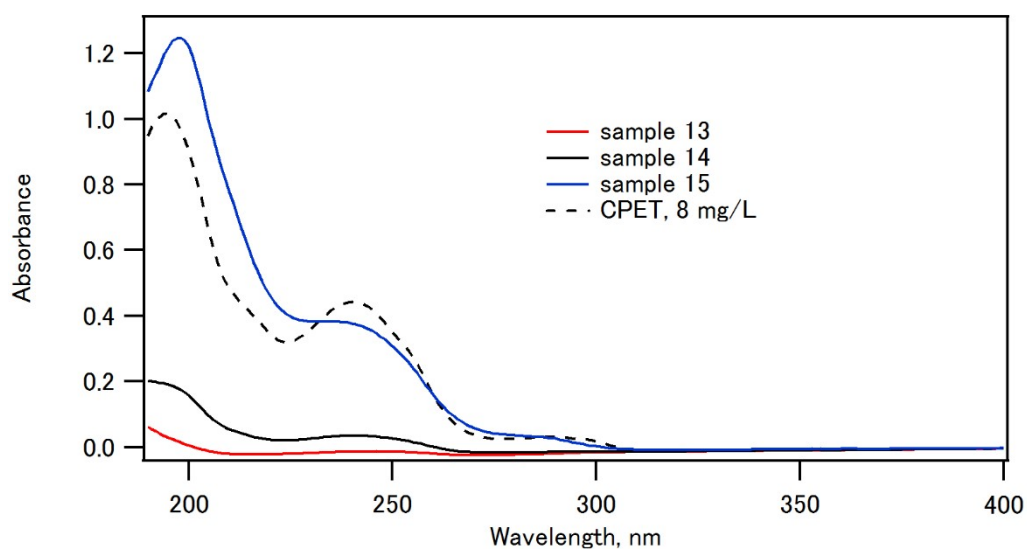

Figure S4. UV-visible spectra of the aqueous phase after immersion of the composite compacts. (a)–(e): immersion at room temperature for 24 h, (f)–(j): immersion at 37 °C for 1 week.

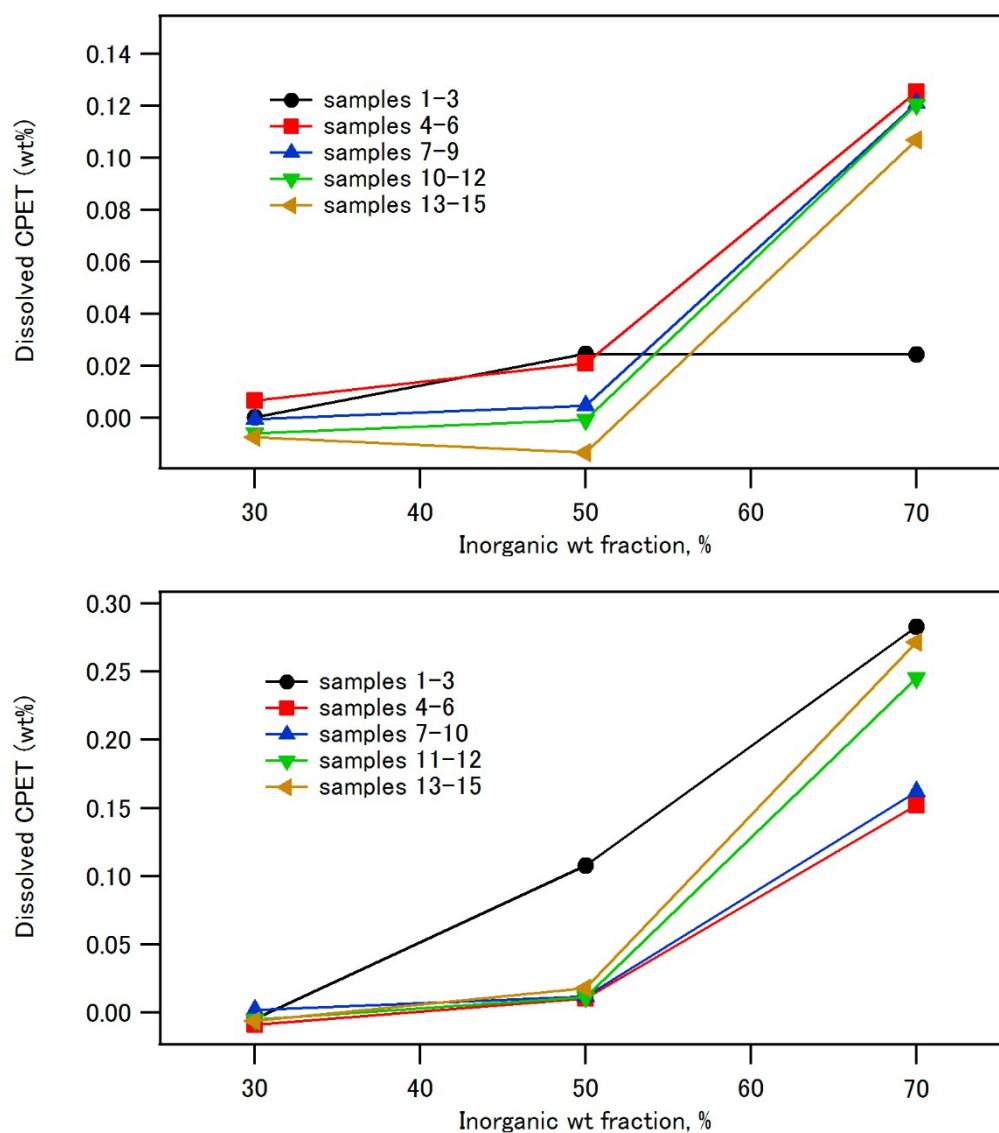

Figure S5. The weight % of CPET dissolved in water after immersion in water at room temperature for 24 h (a), and at 37 °C for 1 week, determined by UV-visible spectra of the water phase.

Table S1. Concentrations of CPET (mg/L) in the aqueous phase after immersion of the compacts in 20 mL water at room temperature for 24 h or at 37 °C for 1 week.

| Sample | Room temperature, 24 h | 37 °C, 1 week |
|--------|------------------------|---------------|
| 1      | 0.01                   | 0             |
| 2      | 0.9                    | 4.1           |
| 3      | 0.7                    | 8.4           |
| 4      | 0.3                    | 0             |
| 5      | 0.8                    | 0.4           |
| 6      | 3.3                    | 4.0           |
| 7      | 0                      | 0.1           |
| 8      | 0.2                    | 0.4           |
| 9      | 3.3                    | 4.4           |
| 10     | 0                      | 0             |
| 11     | 0                      | 0.4           |
| 12     | 2.8                    | 6.2           |
| 13     | 0                      | 0             |
| 14     | 0                      | 0.6           |
| 15     | 2.7                    | 6.8           |

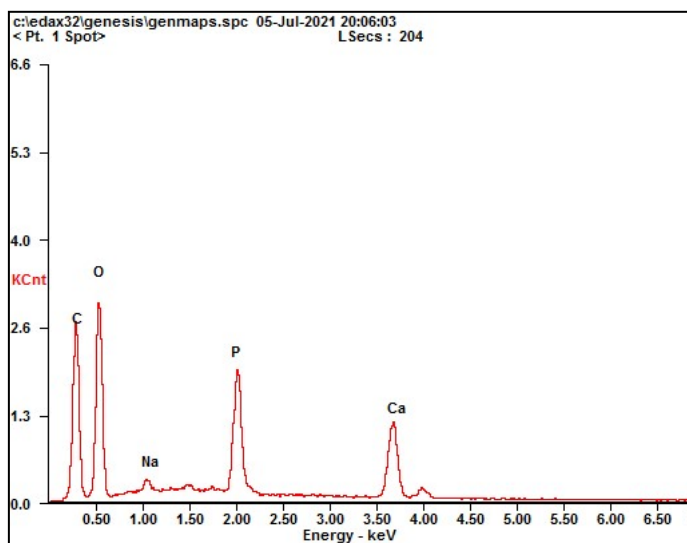

| <i>Element</i>       | <i>Wt%</i> | <i>At%</i> |
|----------------------|------------|------------|
| <b><i>CK</i></b>     | 23.82      | 37.41      |
| <b><i>OK</i></b>     | 34.16      | 40.27      |
| <b><i>NaK</i></b>    | 01.21      | 00.99      |
| <b><i>PK</i></b>     | 15.28      | 09.31      |
| <b><i>CaK</i></b>    | 25.53      | 12.02      |
| <b><i>Matrix</i></b> | Correction | ZAF        |

Figure S6. Energy dispersion spectra of the fracture surface of pristine sample 14.

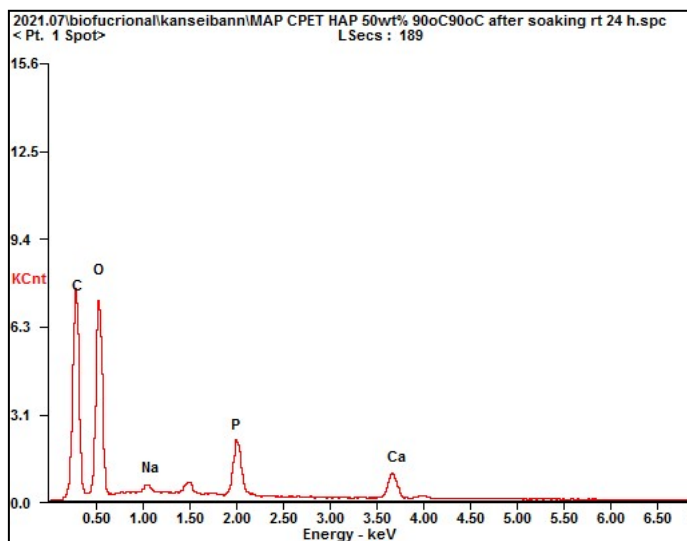

| <i>Element</i>       | <i>Wt%</i> | <i>At%</i> |
|----------------------|------------|------------|
| <b><i>CK</i></b>     | 35.49      | 47.25      |
| <b><i>OK</i></b>     | 42.58      | 42.56      |
| <b><i>NaK</i></b>    | 01.03      | 00.72      |
| <b><i>PK</i></b>     | 09.75      | 05.03      |
| <b><i>CaK</i></b>    | 11.15      | 04.45      |
| <b><i>Matrix</i></b> | Correction | ZAF        |

Figure S7. Energy dispersion spectra of the fracture surface of sample 14 after immersed in water at room temperature for 24 h.

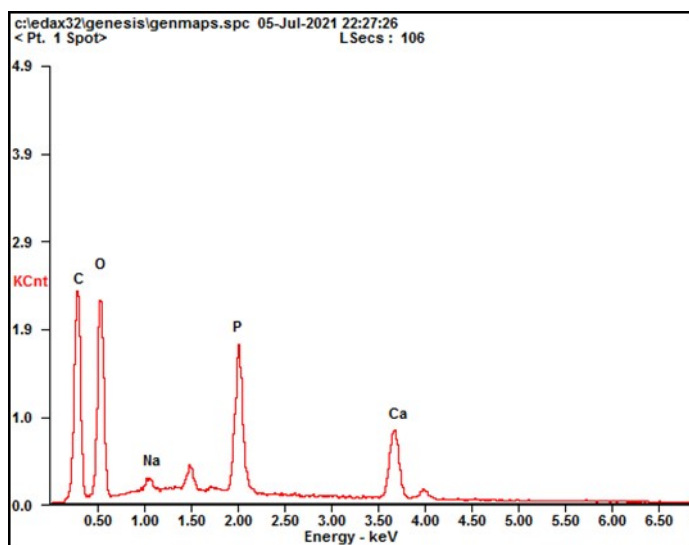

| <i>Element</i>       | <i>Wt%</i> | <i>At%</i> |
|----------------------|------------|------------|
| <b><i>CK</i></b>     | 27.50      | 42.10      |
| <b><i>OK</i></b>     | 31.74      | 36.48      |
| <b><i>NaK</i></b>    | 01.21      | 00.97      |
| <b><i>PK</i></b>     | 17.09      | 10.15      |
| <b><i>CaK</i></b>    | 22.45      | 10.30      |
| <b><i>Matrix</i></b> | Correction | ZAF        |

Figure S8. Energy dispersion spectra of the fracture surface of sample 14 after immersed in water at 37 °C for 1 week.

#### 4. Mechanical properties of compacts after immersion in water.

Table S2. Mechanical properties and densities of the compacts after immersion in water at room temperature for 24 h.

| Sample | density (g/cm <sup>3</sup> ) | Bending strain (%) | Bending strength (MPa) | Elastic modulus 1 (GPa) | Elastic modulus 2 (GPa) | Fracture energy (MJ/m <sup>3</sup> ) | <i>N</i> <sup>b</sup> |
|--------|------------------------------|--------------------|------------------------|-------------------------|-------------------------|--------------------------------------|-----------------------|
| 1      | 1.331 ± 0.004                | 1.3 ± 0.1          | 15 ± 2                 | 0.70 ± 0.03             | 1.6 ± 0.1               | 0.083 ± 0.008                        | 3                     |
| 2      | 1.54 ± 0.01                  | 1.7 ± 0.1          | 14 ± 2                 | 0.7 ± 0.3               | 1.0 ± 0.1               | 0.12 ± 0.03                          | 3                     |
| 3      | 1.82 ± 0.03                  | <i>a</i>           | <i>a</i>               | <i>a</i>                | <i>a</i>                | <i>a</i>                             | 3                     |
| 4      | 1.382 ± 0.008                | 1.8 ± 0.1          | 21.0 ± 0.2             | 1.0 ± 0.1               | 1.8 ± 0.2               | 0.19 ± 0.02                          | 3                     |
| 5      | 1.53 ± 0.03                  | 1.6 ± 0.3          | 17 ± 1                 | 0.8 ± 0.1               | 1.5 ± 0.1               | 0.12 ± 0.02                          | 3                     |
| 6      | 1.608 ± 0.009                | <i>a</i>           | <i>a</i>               | <i>a</i>                | <i>a</i>                | <i>a</i>                             | 3                     |
| 7      | 1.376 ± 0.006                | 1.8 ± 0.3          | 22 ± 3                 | 0.80 ± 0.04             | 1.7 ± 0.2               | 0.17 ± 0.05                          | 3                     |
| 8      | 1.597 ± 0.004                | 2.2 ± 0.1          | 25 ± 2                 | 0.9 ± 0.2               | 1.8 ± 0.1               | 0.23 ± 0.03                          | 3                     |
| 9      | 1.73 ± 0.03                  | <i>a</i>           | <i>a</i>               | <i>a</i>                | <i>a</i>                | <i>a</i>                             | 3                     |
| 10     | 1.39 ± 0.01                  | 1.4 ± 0.2          | 21 ± 1                 | 1.1 ± 0.2               | 1.8 ± 0.3               | 0.130 ± 0.009                        | 3                     |
| 11     | 1.62 ± 0.02                  | 2.0 ± 0.1          | 30 ± 1                 | 1.1 ± 0.2               | 2.5 ± 0.1               | 0.26 ± 0.01                          | 3                     |
| 12     | 1.87 ± 0.02                  | 1.0 ± 0.3          | 13.1 ± 0.5             | 1.2 ± 0.4               | 1.5 ± 0.2               | 0.06 ± 0.01                          | 3                     |
| 13     | 1.369 ± 0.007                | 2.4 ± 0.2          | 26 ± 2                 | 0.46 ± 0.06             | 2.1 ± 0.2               | 0.232 ± 0.009                        | 3                     |
| 14     | 1.64 ± 0.02                  | 2.8 ± 0.3          | 38 ± 2                 | 0.55 ± 0.03             | 1.9 ± 0.1               | 0.45 ± 0.05                          | 3                     |
| 15     | 1.81 ± 0.01                  | <i>a</i>           | <i>a</i>               | <i>a</i>                | <i>a</i>                | <i>a</i>                             | 3                     |

a The compacts were collapsed after immersion in water, and a three point bending test cannot be carried out. b The number of determinations.

Table S3. Mechanical properties and densities of the compacts after immersion in water at 37 °C for 1 week.

| Sample | density (g/cm <sup>3</sup> ) | Bending strain (%) | Bending strength (MPa) | Elastic modulus 1 (GPa) | Elastic modulus 2 (GPa) | Fracture energy (MJ/m <sup>3</sup> ) | <i>N</i> <sup>b</sup> |
|--------|------------------------------|--------------------|------------------------|-------------------------|-------------------------|--------------------------------------|-----------------------|
| 1      | 1.38 ± 0.02                  | 1.5 ± 0.1          | 13 ± 2                 | 0.85 ± 0.08             | 1.20 ± 0.07             | 0.08 ± 0.02                          | 3                     |
| 2      | 1.56 ± 0.02                  | 0.6 ± 0.2          | 5 ± 1                  | 1.0 ± 0.1               | 1.0 ± 0.2               | 0.017 ± 0.009                        | 3                     |
| 3      | 1.82 ± 0.03                  | <i>a</i>           | <i>a</i>               | <i>a</i>                | <i>a</i>                | <i>a</i>                             | 3                     |
| 4      | 1.39 ± 0.02                  | 1.6 ± 0.4          | 15 ± 3                 | 0.8 ± 0.1               | 1.14 ± 0.09             | 0.11 ± 0.04                          | 3                     |
| 5      | 1.542 ± 0.001                | 0.13 ± 0.08        | 2 ± 1                  | 0.6 ± 0.3               | 0.6 ± 0.3               | 0.002 ± 0.002                        | 3                     |
| 6      | 1.79 ± 0.03                  | <i>a</i>           | <i>a</i>               | <i>a</i>                | <i>a</i>                | <i>a</i>                             | 3                     |
| 7      | 1.378 ± 0.004                | 2.1 ± 0.2          | 15.4 ± 0.9             | 0.50 ± 0.05             | 1.03 ± 0.08             | 0.14 ± 0.01                          | 3                     |
| 8      | 1.587 ± 0.008                | 0.45 ± 0.05        | 4.6 ± 0.7              | 0.9 ± 0.1               | 0.9 ± 0.1               | 0.011 ± 0.003                        | 3                     |
| 9      | 1.830 ± 0.008                | <i>a</i>           | <i>a</i>               | <i>a</i>                | <i>a</i>                | <i>a</i>                             | 3                     |
| 10     | 1.39 ± 0.01                  | 1.54 ± 0.05        | 19 ± 1                 | 0.68 ± 0.02             | 1.7 ± 0.2               | 0.123 ± 0.008                        | 5                     |
| 11     | 1.61 ± 0.02                  | 1.2 ± 0.1          | 18 ± 1                 | 1.1 ± 0.1               | 1.5 ± 0.1               | 0.10 ± 0.01                          | 5                     |
| 12     | 1.74 ± 0.03                  | <i>a</i>           | <i>a</i>               | <i>a</i>                | <i>a</i>                | <i>a</i>                             | 5                     |
| 13     | 1.371 ± 0.009                | 2.2 ± 0.2          | 22 ± 1                 | 0.68 ± 0.06             | 1.50 ± 0.02             | 0.21 ± 0.03                          | 3                     |
| 14     | 1.60 ± 0.03                  | 7.43 ± 0.05        | 22.0 ± 0.9             | 0.53 ± 0.04             | 0.18 ± 0.01             | 0.96 ± 0.01                          | 3                     |
| 15     | 1.79 ± 0.04                  | <i>a</i>           | <i>a</i>               | <i>a</i>                | <i>a</i>                | <i>a</i>                             | 3                     |

a The compacts were collapsed after immersion in water, and a three point bending test cannot be carried out. b The number of determinations.
